# Supplementary material for: Quantitative Evaluation of Very Low Levels of HIV-1 Reverse Transcriptase by a Novel Highly Sensitive RT-qPCR Assay
Source: MDPI journal article supplement (doi:10.3390/life12081130), 2022-07-27
Supplement: s1 [file s1]

Supplementary Materials

for

# **Quantitative evaluation of very low levels of HIV-1 reverse transcriptase by a highly sensitive RT-qPCR assay**

by Francesca Marino-Merlo, Valeria Stefanizzi, Agnese Ragno, Lucia Piredda, Sandro Grelli, Beatrice Macchi, Antonio Mastino

## **Contents**

Supplemental Figure S1

Supplemental Figure S2

Supplemental Table S1

Supplemental Table S2

## Supplemental Figure S1

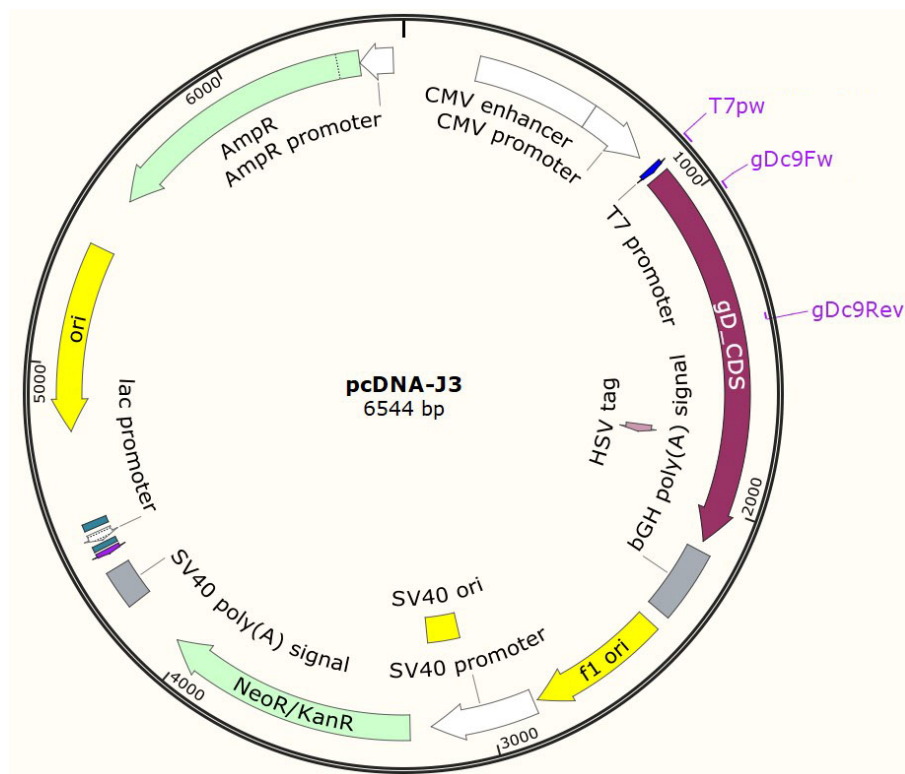

**Figure S1. The pcDNA-J3 expression vector.** Schematic drawing of pcDNA-J3 expression vector contained in I143-J3 cells. The coding DNA sequence (CDS) of HSV-1 US6 gene in pcDNA 3.1 expression vector, corresponding to GenBank accession number L09242.1, is depicted as the dark red region gD-CDS inserted downstream of T7 promoter region (small blue arrow). Position and orientation of the primers used is represented by the violet lines (see Table 1 for amplicon sizes). The map is drawn with SnapGene® software (from Insightful Science; available at [snapgene.com](http://snapgene.com)).

## Supplemental Figure S2

(a)

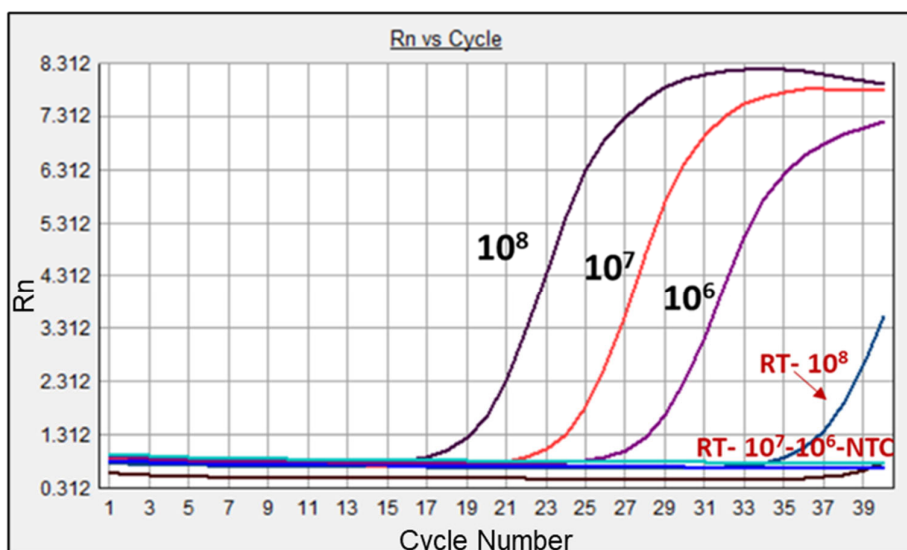

(b)

| gD-RNA-synt (number of molecules used for RT reaction) | RT+        |          | RT-              |                  |                  |                  |
|--------------------------------------------------------|------------|----------|------------------|------------------|------------------|------------------|
|                                                        | CT average | St.dev ± | Ct <sub>v1</sub> | Ct <sub>v2</sub> | Ct <sub>v3</sub> | Ct <sub>v4</sub> |
| 10 <sup>8</sup>                                        | 17.22      | 0.04     | 38.4             | Undet            | 34.4             | Undet            |
| 10 <sup>7</sup>                                        | 21.65      | 0.05     | Undet            | Undet            | Undet            | Undet            |
| 10 <sup>6</sup>                                        | 26.02      | 0.04     | Undet            | Undet            | Undet            | Undet            |

**Figure S2. Optimization of the amounts of gD-RNA-synt to utilize as a template in the RT-qPCR assay.** Real-time PCR analysis of cDNAs produced using three ten-fold dilutions (from 10<sup>8</sup> to 10<sup>6</sup> molecules diluted in RNase-water) of gD-RNA-synt as template and 10<sup>-2</sup> U HIV-RT in RT reaction. (a) Amplification curves of one representative experiment where samples containing complete reaction mixtures (RT+, black text) and corresponding negative controls (RT-, red text) are depicted. Each RT- sample contained the same amount of RNA template used in RT+ samples. (b) Ct values of RT+ samples are reported as mean threshold cycle ± standard deviation from four replicates, while Ct values of RT- samples from four replicates are singularly reported. As shown, occasionally amplification of RT- sample corresponding to 10<sup>8</sup> molecules of gD-RNA-synt template was detected at high Ct values.

Supplemental Table S1

**Table S1.** Comparison between the CT values obtained in the same experiment using total RNA or gD-RNA-synt as a template. Reaction conditions: 1X RT-Buffer, 0.2 mM dNTP mix, 0.5 µM gD-reverse primer, 0.025 U HIV-RT, 1 h at 37°C + 5 min at 90°C.

| RNA template        |            |          |
|---------------------|------------|----------|
|                     | CT average | St.dev ± |
| Total RNA (150 ng)  | 25.09      | 0.98     |
| gD-RNA-synt (10 ng) | 3.20       | 0.10     |

## Supplemental Table S2

**Table S2.** Comparison between the CT values obtained in the same experiment using fixed amounts of total RNA or gD-RNA-synt as a template and variable amounts of HIV RT. Reaction conditions: 1X RT-Buffer, 0.2 mM dNTP mix, 0.5  $\mu$ M gD-reverse primer, 1 h at 37°C + 5 min at 90°C.

| RNA template                            | HIV-RT [U]             | RT+     |              | RT-              |                  |                  |
|-----------------------------------------|------------------------|---------|--------------|------------------|------------------|------------------|
|                                         |                        | Average | St.dev $\pm$ | Ct <sub>v1</sub> | Ct <sub>v2</sub> | Ct <sub>v3</sub> |
| Total RNA (150 ng)                      | 2.5 x 10 <sup>-2</sup> | 24.71   | 0.12         | Undet            | Undet            | 32.24            |
|                                         | 2.5 x 10 <sup>-3</sup> | 26.73   | 0.96         | Undet            | 32.80            | Undet            |
|                                         | 2.5 x 10 <sup>-4</sup> | Undet   | -            | Undet            | Undet            | Undet            |
| gD-RNA-synt (0.3 x 10 <sup>-3</sup> ng) | 2.5 x 10 <sup>-2</sup> | 22.40   | 0.18         | Undet            | Undet            | Undet            |
|                                         | 2.5 x 10 <sup>-3</sup> | 24.26   | 0.04         | Undet            | Undet            | Undet            |
|                                         | 2.5 x 10 <sup>-4</sup> | 30.63   | 0.50         | Undet            | Undet            | Undet            |
